# Supplementary material for: The role of Galectin-3 in α-synuclein-induced microglial activation
Source: Springer Nature journal article supplement (doi:10.1186/s40478-014-0156-0), 2014-11-12

# Supplementary Figure 1

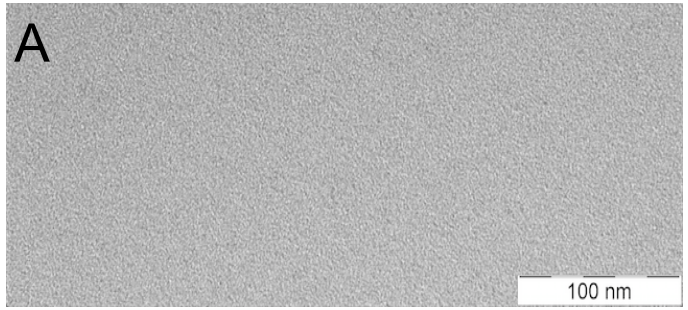

**Control**

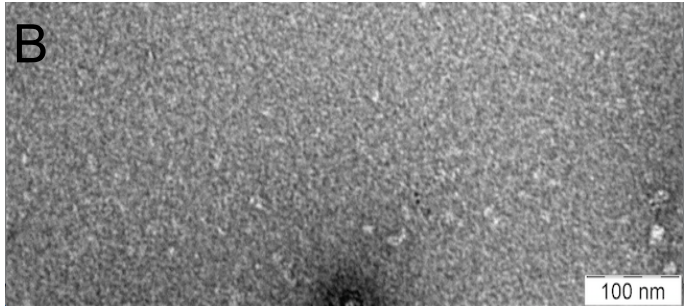

**Monomers**

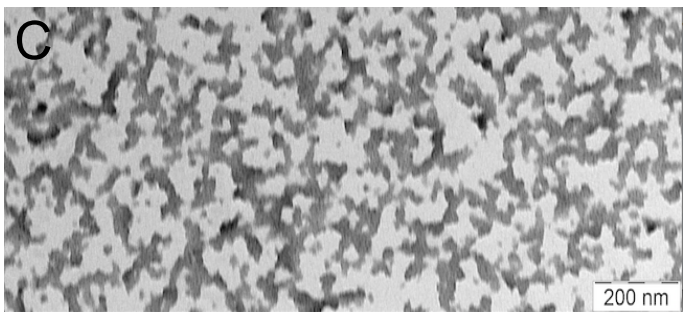

**Aggregates**

**D<sub>1</sub>**

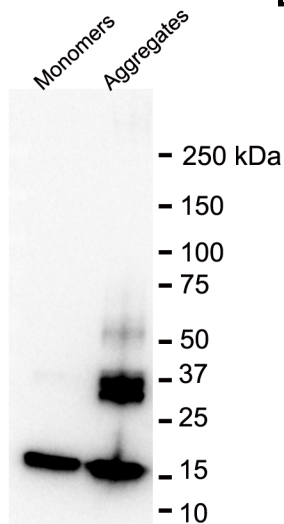

**D<sub>2</sub>**

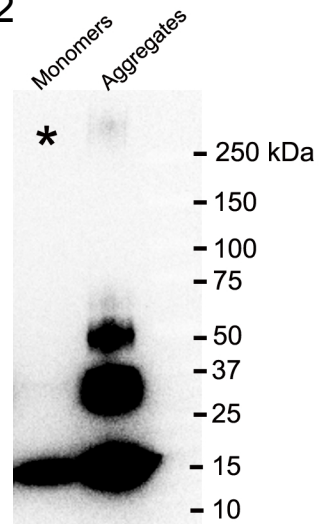

Supplement: MOESM11 [file 25665622]
