# Supplementary figures and images for: The role of Galectin-3 in α-synuclein-induced microglial activation
Source: Springer Nature journal article supplement (doi:10.1186/s40478-014-0156-0), 2014-11-12

Figure 7-2

B

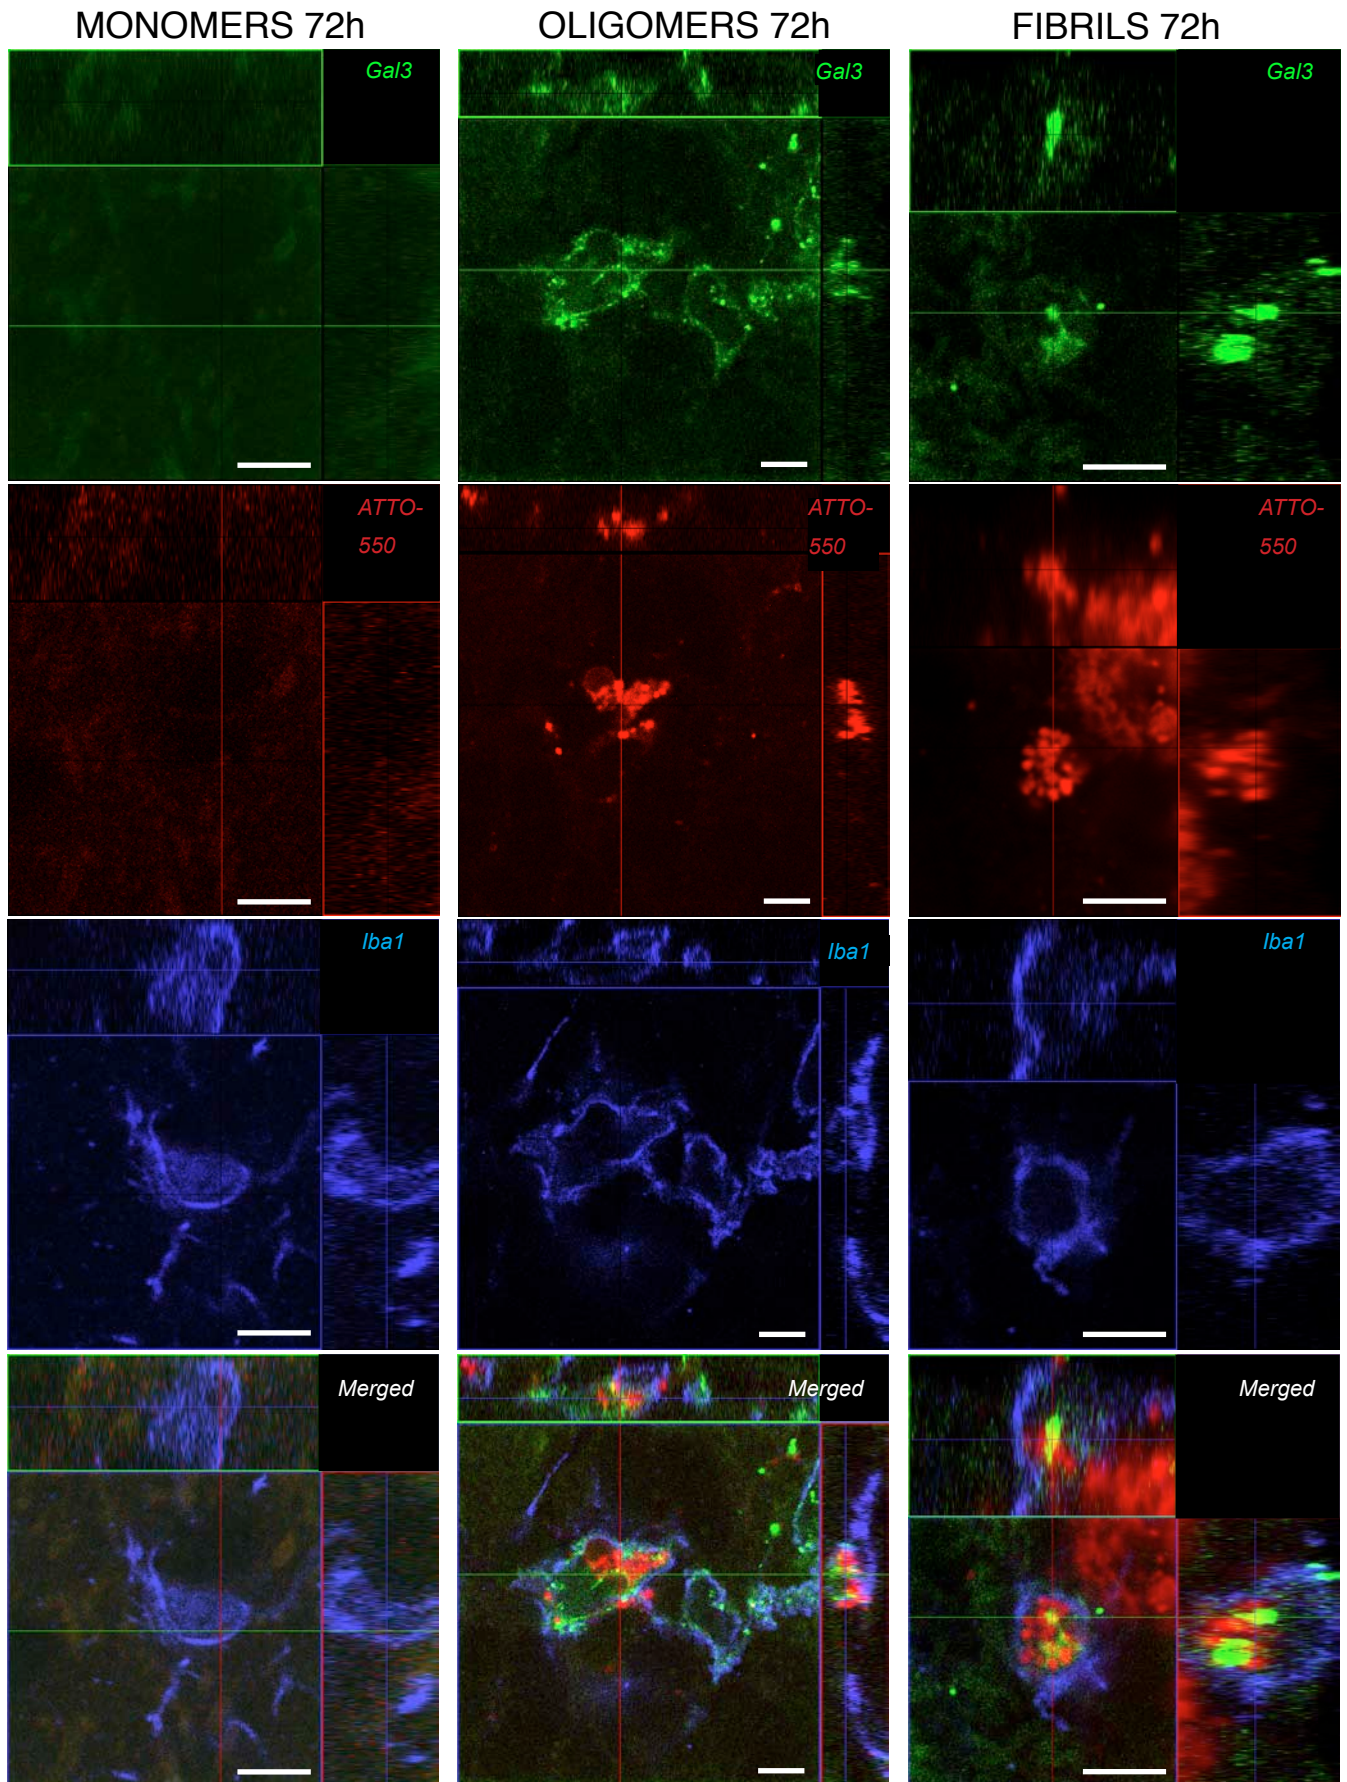

Supplement: MOESM10 [file 25665622]
